# Supplementary material for: Designing ultratough, malleable and foldable biocomposites for robust green electronic devices
Source: Royal Society of Chemistry journal article supplement (doi:10.1039/d1ta09128j), 2021-12-09
Supplement: d1ta09128j1.pdf [file d1ta09128j1.pdf]

**Supporting Information for:**

**Designing Ultratough, Malleable and Foldable Biocomposites for Robust Green  
Electronic Devices**

*Xunan Hou<sup>a</sup>, Siqu Liu<sup>a</sup>, Chaobin He<sup>\*a,b</sup>*

<sup>a</sup>Department of Materials Science and Engineering, National University of Singapore, 9  
Engineering Drive 1, Singapore 117575

<sup>b</sup>Institute of Materials Research and Engineering, Agency for Science, Technology, and  
Research (A\*STAR), 2 Fusionopolis Way, Innovis, Singapore 138634

**This file contains:**

**Supporting Text**

**Figures S1-S9**

**Tables S1-S5**

## Supporting Text

### 1. Theory

Dependence of glass transition on composition is a semiquantitative method to assess the attractive interaction between polymers. The T<sub>g</sub>-composition dependence can be interpreted from the Gordon-Taylor equation<sup>[1]</sup>:

$$T_g = T_{g,1} + \frac{kw_1(T_{g,2} - T_{g,1})}{w_1 + kw_2} \quad (\text{Eq. S1})$$

where  $T_{g,i}$  are the glass transition temperatures, while  $w_i$  are the weight fractions of each component.  $k$  is an adjustable parameter related to changes in heat capacity during glass transition:

$$k = \frac{\Delta c_{p2}}{\Delta c_{p1}} \left( 1 + w_1 \frac{\partial c_p^l}{\Delta c_{p2}} + w_2 \frac{\partial c_p^g}{\Delta c_{p1}} \right) \quad (\text{Equation S2})$$

where  $\Delta c_{pi}$  denotes the change in heat capacity  $c_{pi}$  at glass transition for the  $i$ th component.  $c_{pi}$  was measured according to literature<sup>[2]</sup>.  $k$  is calculated from  $c_{pi}$  values before and after the T<sub>g</sub>.  $\partial c_p^l$  and  $\partial c_p^g$  are the derivative change in heat capacity in the liquid and glass phase, respectively. Lu et al.<sup>[1]</sup> developed a modified Gordon-Taylor model to predict T<sub>g</sub>-composition relationships in binary polymer blends. When interactions between the components are negligible,  $\partial c_p^l$  and  $\partial c_p^g$  become infinitesimal and the  $k$  value is reduced to

$$K_0 = \frac{\Delta c_{p2}}{\Delta c_{p1}}$$

### 2. Differential scanning calorimetry (DSC)

In the LBO composites, the determination of T<sub>g</sub> of PLA and PHB phase is not reliable due to:

i) The endothermic peak of the PHB rigid amorphous fractions<sup>[3,4]</sup> overlapping with the T<sub>g</sub> of

PLA phase (40-55 °C); ii) the high crystallinity of PHB that hinders occurring near its  $T_g$  (-5 to 5 °C).

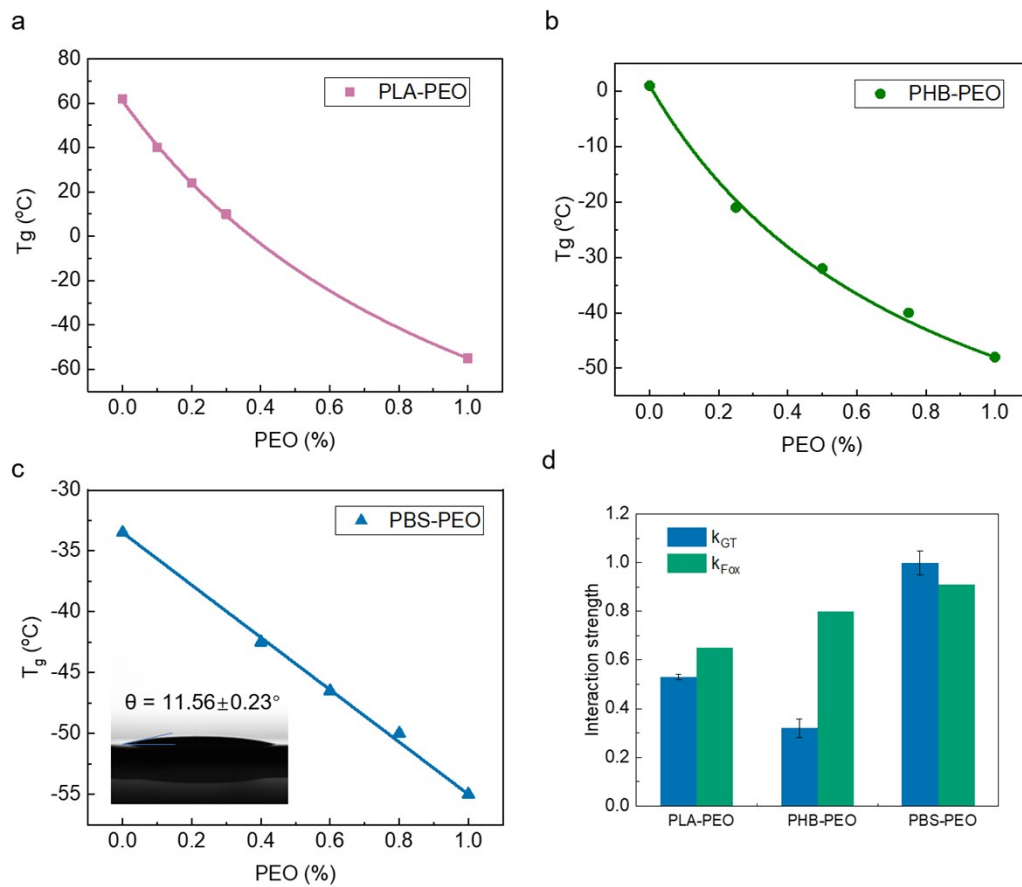

Fig. S1 (a-c) Glass transition temperature – composition relationship in binary biodegradable polymer blends. (d) interaction strength parameter  $k_{GT}$  and critical value  $k_{Fox}$  of three polymer pairs.

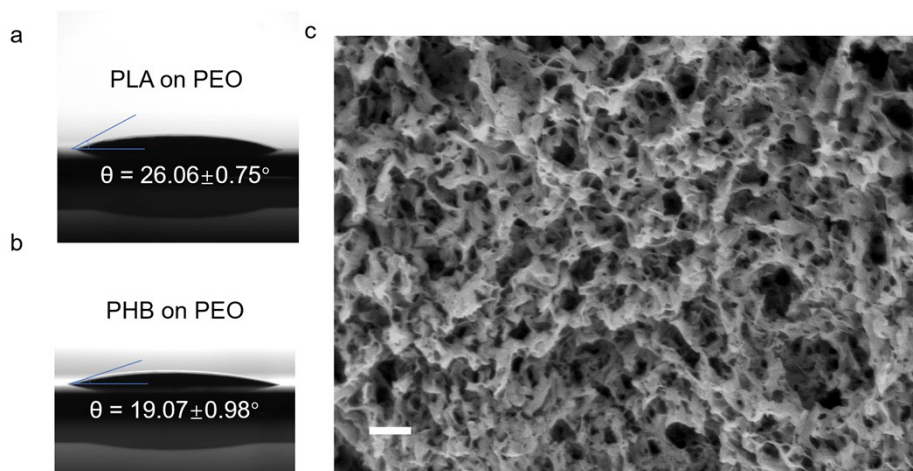

Fig. S2 (a-b) melt contact angle between polymers. (c) FESEM images of cryo-impact surface after solvent etching. Scale bar is 2  $\mu\text{m}$ .

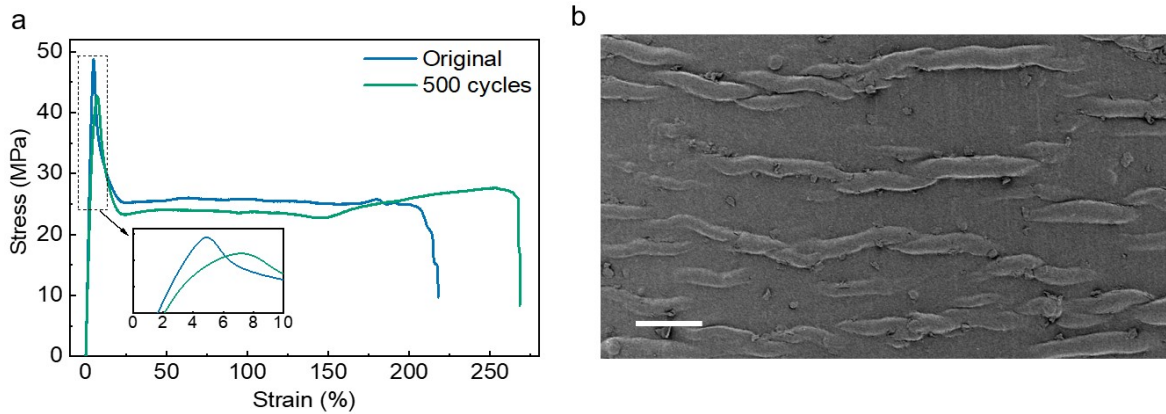

Fig. S3 (a) Stress-strain curves of LBO-3 blends ( $\sim 3\text{mm}$  thick) after 500 cycles of  $180^\circ$  bend. (b) SEM images of the LBO-3 blend. Scale bar is 100  $\mu\text{m}$ .

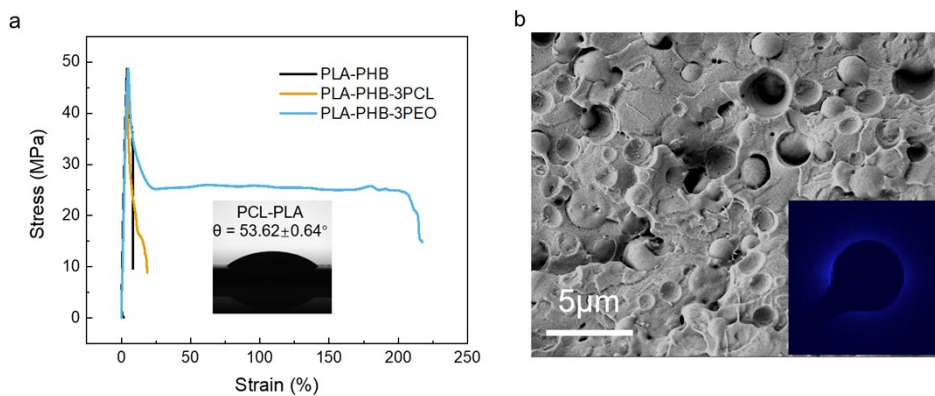

Fig. S4 (a) Stress-strain curves of different polymer systems compared with PLA-PHB-PEO blends. Inset: contact angles of relevant polymer pairs. (b) FESEM images of tensile fractured surface of PLA-PHB-3PCL. Inset: corresponding SAXS patterns. Color scale: 0-2000.

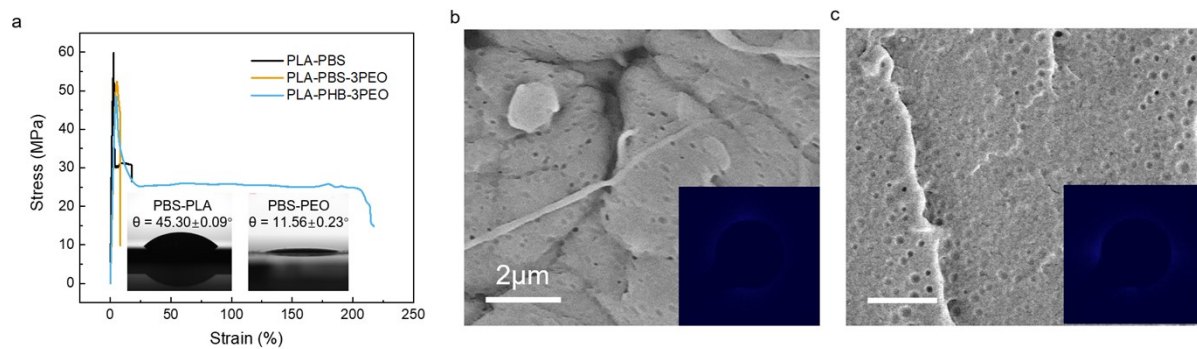

Fig. S5 (a) Stress-strain curves of different polymer systems compared with PLA-PHB-PEO blends. Inset: contact angles of relevant polymer pairs. FESEM images of tensile fractured surfaces of (b) PLA-PBS (c) PLA-PBS-3PEO. Inset: corresponding SAXS patterns. Color scale: 0-2000.

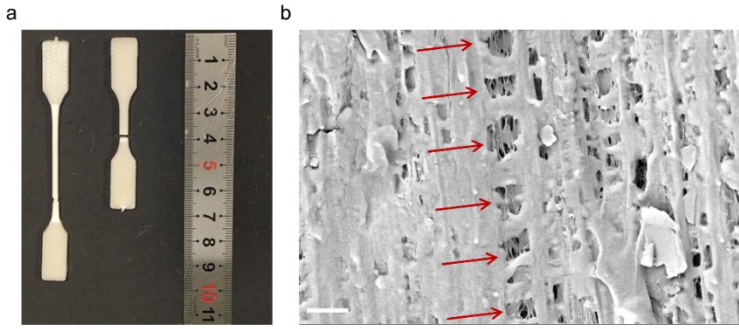

Fig. S6 (a) Digital images showing the tensile elongation in LBO-3 (left) compared to LBO-0 (right); (b) SEM images showing crazes in fractured LBO-3 sample. Tension direction is near vertical.

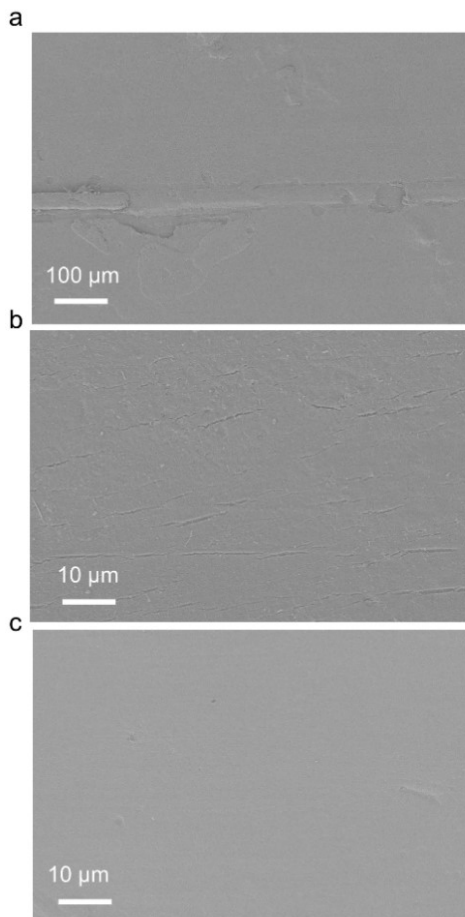

Fig. S7 SEM images of 50  $\mu\text{m}$  thick films of (a) (b) neat PLA after 10 cycle 90° folds; (c) LBO-3 sample after 500 cycle 90° fold.

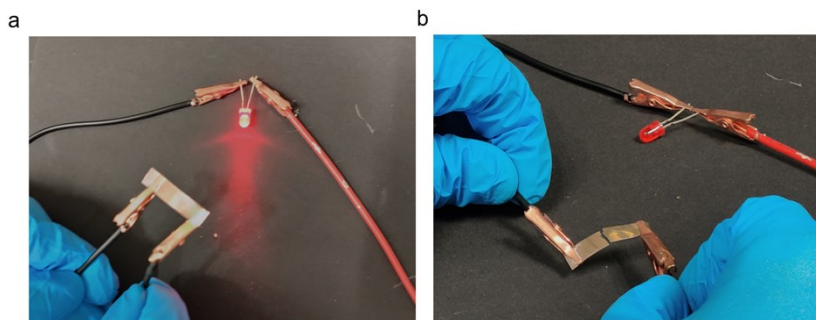

Fig. S8 Electronic conduction test of LBO-0 film: (a) original form; (b) bent and fractured with open-circuit.

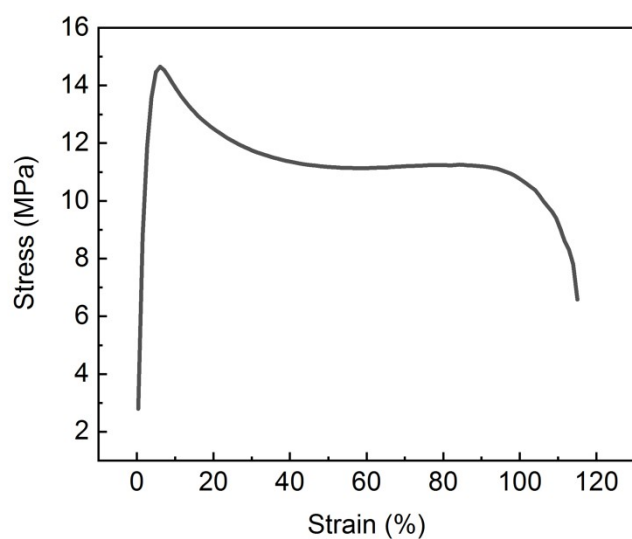

Fig. S9 Representative stress-strain curve of crumpled LBO-3 film up to >100% elongation. The lower tensile strength was due to different processing pressures for thin films (~20 MPa) and bulk samples (~70 MPa)

Table S1 Mechanical properties of polymer blends and ternary biocomposites, along with standard deviations ( $\sigma$ )

|                    | Modulus | $\sigma$ | Strength | $\sigma$ | Elongation | $\sigma$ | Toughness <sup>1</sup> | $\sigma$             |
|--------------------|---------|----------|----------|----------|------------|----------|------------------------|----------------------|
|                    | [GPa]   | [GPa]    | MPa      | MPa      | [%]        | [%]      | [MJ/m <sup>3</sup> ]   | [MJ/m <sup>3</sup> ] |
| PLA                | 3.44    | 0.25     | 64.12    | 0.75     | 3.65       | 0.85     | 1.15                   | 0.24                 |
| PHB                | 0.59    | 0.08     | 12.38    | 0.27     | 2.97       | 0.21     | 0.23                   | 0.05                 |
| LBO-0 <sup>2</sup> | 3.37    | 0.22     | 48.09    | 0.54     | 5.79       | 2.24     | 1.74                   | 0.95                 |
| LBO-3              | 3.45    | 0.15     | 49.27    | 0.51     | 247.93     | 26.66    | 62.84                  | 6.09                 |
| LBO-5              | 2.76    | 0.12     | 47.83    | 0.94     | 300.23     | 13.91    | 86.58                  | 7.54                 |
| BO-1               | 0.55    | 0.03     | 13.52    | 0.47     | 5.73       | 1.13     | 0.46                   | 0.07                 |
| BO-3               | 0.53    | 0.02     | 13.72    | 0.42     | 8.39       | 1.45     | 0.59                   | 0.06                 |
| BO-5               | 0.52    | 0.02     | 13.00    | 0.38     | 8.25       | 0.96     | 0.74                   | 0.10                 |
| LBO-10             | 1.72    | 0.16     | 23.64    | 1.92     | 207.56     | 14.41    | 44.56                  | 1.24                 |
| LBC-3              | 3.25    | 0.14     | 44.26    | 0.57     | 16.10      | 2.35     | 2.40                   | 0.38                 |
| LS-25              | 3.56    | 0.27     | 58.01    | 0.87     | 161.50     | 18.15    | 53.18                  | 5.23                 |
| LSO-3              | 3.45    | 0.32     | 51.67    | 0.72     | 10.23      | 1.24     | 3.50                   | 0.47                 |

<sup>1</sup>: calculated from the area under stress-strain curves.

<sup>2</sup>: Abbreviated forms: L = PLA, B = PHB, O = PEO, C = PCL, S = PBS; For ternary composites, 1<sup>st</sup> component is the continuous phase, the 2<sup>nd</sup> component is the disperse phase (fixed at 25% wt).



Table S2 Parameters from statistical analysis of FESEM images (ImageJ software).

| Slice | Count | Total Area      | Average Size    | Feret    | MinFeret |
|-------|-------|-----------------|-----------------|----------|----------|
|       | -     | nm <sup>2</sup> | nm <sup>2</sup> | nm       | nm       |
| LBO-0 | 22    | 37845983        | 1720271.955     | 1716.178 | 1361.23  |
| LBO-3 | 77    | 4608025         | 59844.477       | 299.963  | 217.402  |

Table S3

Comparison of the mechanical properties of LBO blends with literature reports of other polymer blends/ composites.

| Parameters         | Strength  | Elongation | Toughness*        | Reference |
|--------------------|-----------|------------|-------------------|-----------|
| Units              | MPa       | %          | MJ/m <sup>3</sup> |           |
| PS/PPE (Noryl®)    | 35-68     | 25-82      | 17-28.7           | [5]       |
| ABS/PC             | 45-50     | 40-80      | 18-40             | [5]       |
| PP/elastomer (TPV) | 6.2-8.8   | 45-100     | 19-43.12          | [5]       |
| PHB/PHBV           | 22.6-25.6 | 539-589    | 99.8-103.5        | [6]       |
| PLA/EB             | 22-40     | 130-220    | 28-40             | [7]       |
| PE/iPP             | 20-25     | 180-400    | 36-88             | [8]       |
| Ag/Au/SBS          | 3-22      | 180-840    | 4.5-93.5          | [9]       |
| PVA/GO             | 64-120    | 1.2-2.4    | 1.44-1.53         | [10]      |
| PLA/CSNP           | 33-35     | 48-288     | 14-75             | [11]      |
| UHMWPE/GO          | 23-27     | 75-290     | 17.25-78.3        | [12]      |
| PLA/PoSS           | 38-52     | 48-65      | 18.2-29.2         | [13]      |
| PVAm/PVA           | 20-70     | 16-40      | 8-22              | [14]      |
| PLA/PHB/PEO        | 47-50     | 198-301    | 60-85             | This work |

\*Values are determined from the area below the stress-strain curves, or estimated from strength and elongation values

Table S4 Thermal properties of LBO-x ternary biocomposites

|        | $T_{\alpha}^a$ | $T_{cc,PLA}^b$ | $T_{m,PLA}^b$ | $T_{m,PHB}^b$ | $\Delta H_{cc,PLA}^c$ | $\Delta H_{m,PLA}^c$ | $\Delta H_{m,PHB}^c$ | $X_{c,PLA}^d$ | $X_{c,PHB}^d$ |       |
|--------|----------------|----------------|---------------|---------------|-----------------------|----------------------|----------------------|---------------|---------------|-------|
|        | °C             | °C             | °C            | °C            | J/g                   | J/g                  | J/g                  | %             | %             |       |
| LBO-0  | 57.41          | 100.49         | 154.20        | 172.42        | 26.15                 | 27.32                | 14.25                | 1.68          | 39.04         |       |
| LBO-3  | 52.51          | 87.13          | 153.78        | 169.47        | 21.50                 | 23.37                | 14.43                | 2.79          | 39.53         |       |
| LBO-5  | 51.94          | 81.64          | 153.03        | 168.96        | 23.33                 | 25.15                | 15.16                | 2.80          | 41.53         |       |
| LBO-10 | 51.53          | 88.57          | 153.61        | 167.96        | 175.04                | 16.01                | 19.71                | 14.57         | 6.12          | 39.92 |

a) Weight percentage of PMMA. b) glass-rubbery transition temperature from DMA tand curve. c) Obtained from DSC thermogram: the glass transition temperature ( $T_g$ ), cold crystallization temperature ( $T_{cc}$ ), enthalpy of cold crystallization ( $\Delta H_{cc}$ ) and melting ( $\Delta H_m$ ). d)

calculated using the formula 
$$X_c = \frac{\Delta H_{m,i} - \Delta H_{cc,i}}{w_i \Delta H_{c,i}}$$
, where w is the weight fraction of the polymer in the blend,  $\Delta H_{c,i}$  is the crystallization enthalpy of fully crystallized polymer.  $\Delta H_{c,PLA} = 93 \text{ J/g}^{[15]}$ ,  $\Delta H_{c,PHB} = 146 \text{ J/g}^{[16]}$ .

Table S5 TGA results of binary and ternary blends

|       | $T_{d,onset, PHB}$ | $T_{max, PHB}$ | $T_{max, PLA}$ | $T_{50}$ |
|-------|--------------------|----------------|----------------|----------|
|       | °C                 | °C             | °C             | °C       |
| LBO-0 | 248.04             | 266.93         | 353.83         | 333.36   |
| LBO-3 | 267.67             | 284.33         | 355.47         | 345.52   |
| LBO-5 | 280.21             | 292.90         | 362.12         | 346.65   |

## References

- [1] X. Lu, R. A. Weiss, *Macromolecules* **1992**, *25*, 3242.
- [2] American Society for Testing and Materials (ASTM®), *ASTM Stand.* **2011**, *i*, 1.
- [3] M. L. Di Lorenzo, M. C. Righetti, *J. Therm. Anal. Calorim.* **2013**, *112*, 1439.
- [4] M. L. Di Lorenzo, M. Gazzano, M. C. Righetti, *Macromolecules* **2012**, *45*, 5684.
- [5] L. A. Utracki, C. A. Wilkie, *Polymer Blends Handbook* (Eds.: Utracki, L. A.; Wilkie, C. A.), Springer Netherlands, Dordrecht, **2014**.
- [6] X. Tang, A. H. Westlie, E. M. Watson, E. Y. X. Chen, *Science (80-. )*. **2019**, *366*, 754.
- [7] R. Li, L. Wu, B. G. Li, *Eur. Polym. J.* **2018**, *100*, 178.
- [8] J. M. Eagan, J. Xu, R. Di Girolamo, C. M. Thurber, C. W. Macosko, A. M. La Pointe, F. S. Bates, G. W. Coates, *Science (80-. )*. **2017**, *355*, 814.
- [9] S. Choi, S. I. Han, D. Jung, H. J. Hwang, C. Lim, S. Bae, O. K. Park, C. M. Tschabrunn, M. Lee, S. Y. Bae, J. W. Yu, J. H. Ryu, S. W. Lee, K. Park, P. M. Kang, W. B. Lee, R. Nezafat, T. Hyeon, D. H. Kim, *Nat. Nanotechnol.* **2018**, *13*, 1048.
- [10] Y. Q. Li, T. Yu, T. Y. Yang, L. X. Zheng, K. Liao, *Adv. Mater.* **2012**, *24*, 3426.
- [11] H. He, Z. Duan, Z. Wang, *Compos. Part A Appl. Sci. Manuf.* **2020**, *128*, 105676.
- [12] Y. Chen, Y. Qi, Z. Tai, X. Yan, F. Zhu, Q. Xue, *Eur. Polym. J.* **2012**, *48*, 1026.
- [13] Z. Liu, D. Hu, L. Huang, W. Li, J. Tian, L. Lu, C. Zhou, *Chem. Eng. J.* **2018**, *346*, 649.
- [14] A. Eckert, T. Rudolph, J. Guo, T. Mang, A. Walther, *Adv. Mater.* **2018**, *30*, 1.
- [15] S. Saeidlou, M. A. Huneault, H. Li, C. B. Park, *Prog. Polym. Sci.* **2012**, *37*, 1657.
- [16] P. J. Barham, A. Keller, E. L. Otun, P. A. Holmes, *J. Mater. Sci.* **1984**, *19*.
